# Supplementary material for: Promoting the formation of oxygen vacancies in ceria multishelled hollow microspheres by doping iron for enhanced ambient ammonia electrosynthesis
Source: Royal Society of Chemistry journal article supplement (doi:10.1039/d1qi01539g), 2022-01-01
Supplement: d1qi01539g1.pdf [file d1qi01539g1.pdf]

## Electronic Supplementary Information

# Promoting formation of oxygen vacancies in ceria multishelled hollow microspheres by doping iron for enhanced ambient ammonia electrosynthesis

Cha Li,<sup>a</sup> Mengmeng Wang,<sup>a</sup> Liping Ren<sup>a</sup> and Hongming Sun<sup>\*a</sup>

<sup>a</sup> College of Chemistry, Tianjin Key Laboratory of Structure and Performance for Functional Molecules, Tianjin Normal University, Tianjin 300387, China

\* Corresponding author. E-mail: hxyshm@tjnu.edu.cn

### Contents

1. Experimental section
2. Characterization of materials
3. Preparations of the working electrodes
4. Electrocatalytic measurements
5. Ammonia quantification by Nessler's reagent method and indophenol blue method
6. Calculations of NH<sub>3</sub> yield and Faradic efficiency (FE)
7. Hydrazine quantification
8. Isotope labeling experiment
9. Figures and tables

### References

## 1. Experimental section

**Material:** Sodium hydroxide (NaOH, 96%) was purchased from Tianjin Kermel Chemical Reagent Co., Ltd. Hydrochloric acid (HCl, 36~38%) was purchased from Tianjin Fengchuan Chemical Reagent Co., Ltd. Ethanol (AR), Isopropanol(AR), sodium sulfate (99%), and ammonium chloride (NH<sub>4</sub>Cl, 99%) were purchased from Tianjin Damao Chemical Trading Co., Ltd. Sodium nitroprusside (C<sub>5</sub>H<sub>4</sub>FeN<sub>6</sub>Na<sub>2</sub>O<sub>3</sub>, 99%) and salicylic acid (C<sub>7</sub>H<sub>6</sub>O<sub>3</sub>, 99.5%) were purchased from Ron Reagent. Hydrazine hydrate (N<sub>2</sub>H<sub>4</sub>, 5% HCl) was obtained from Guobiao (Beijing) Testing and Certification, Co., Ltd. NaClO (6~14% active chlorine basis), Cerium (III) nitrate hexahydrate (Ce(NO<sub>3</sub>)<sub>3</sub>, 99.95%) was obtained from Maclin. Urea (CH<sub>4</sub>N<sub>2</sub>O, 99.5%), D-(+)-Glucose (C<sub>6</sub>H<sub>12</sub>O<sub>6</sub>, 99.5%), trisodium citrate dihydrate (C<sub>6</sub>H<sub>5</sub>Na<sub>3</sub>O<sub>7</sub>, 98%), p-dimethylaminobenzaldehyde (C<sub>9</sub>H<sub>11</sub>NO, 98%) and Ammonium chloride-<sup>15</sup>N(<sup>15</sup>NH<sub>4</sub>Cl, 98.5%) were purchased from Aladdin Industrial. Ferric Nitrate Nonahydrate(Fe(NO<sub>3</sub>)<sub>3</sub>•9H<sub>2</sub>O, 99%) was purchased from Nine-Dinn chemistry (shanghai) Co., Ltd. <sup>14</sup>N<sub>2</sub> gas (99.999%) and Ar gas (99.999%) were obtained from Huanyu Co., Ltd. <sup>15</sup>N<sub>2</sub> gas (99.99%) was obtained from Tianjin Taiya Co., Ltd. All chemicals were used as received without further purification.

### Synthesis of CeO<sub>2</sub> HM and Fe-CeO<sub>2</sub> HM

The preparation of multishelled Fe-CeO<sub>2</sub> HM can be divided into three steps: synthesis of carbon sphere/Ce/Fe compound, annealing the carbon sphere/Ce/Fe compound in air to form multishelled Fe-CeO<sub>2</sub> hollow microsphere precursor, and then annealing the precursor in hydrogen and argon mixture (H<sub>2</sub>/Ar = 1/9) to form Fe-CeO<sub>2</sub> HM with oxygen vacancies. Typically, 5.4 g glucose (C<sub>6</sub>H<sub>12</sub>O<sub>6</sub>•H<sub>2</sub>O), 0.56 g urea (CO(NH<sub>2</sub>)<sub>2</sub>), 0.1529 g Fe(NO<sub>3</sub>)<sub>3</sub>•9H<sub>2</sub>O and 0.1644 g Ce(NO<sub>3</sub>)<sub>3</sub>•6H<sub>2</sub>O were dissolved in 70 mL deionized water with adequate stirring at room temperature. Then, the mixed solution was transferred into Teflon-lined stainless steel autoclave (100 mL) and reacted at 160 °C for 16 h. After the reaction, the solution was naturally cooled to room temperature, and the black-brown precipitate in the autoclave was collected. Subsequently, the black-brown precipitate washed with distilled water and ethanol for several times, and dried at 60 °C for 12 h. The obtained black-brown powder was calcined in air at 550 °C for 4 h, forming multishelled Fe-CeO<sub>2</sub> hollow microsphere precursor (abbreviated as Fe-CeO<sub>2</sub> HM-Precursor). For generating oxygen vacancies, the multishelled Fe-CeO<sub>2</sub> hollow microsphere precursor was further calcined at 200 °C under hydrogen and argon mixture (H<sub>2</sub>/Ar = 1/9) atmosphere for 0.5 h, obtaining the multishelled Fe-CeO<sub>2</sub> hollow microspheres (Fe-CeO<sub>2</sub> HM) with rich oxygen vacancies. The pure CeO<sub>2</sub> HM, Fe<sub>2</sub>O<sub>3</sub> HM and Fe doped CeO<sub>2</sub> HM sample with other Fe doping mass content were synthesised using same synthesis method.

For comparison, Fe-CeO<sub>2</sub> nanorods were also prepared by a previously reported method<sup>1</sup>. Typically, 1.644 g Ce(NO<sub>3</sub>)<sub>3</sub>•6H<sub>2</sub>O and 0.217 g Fe(NO<sub>3</sub>)<sub>3</sub>•9H<sub>2</sub>O and were dissolved in 20 mL deionized water to form solution A. Then, 20 g NaOH was dissolved in 60 mL deionized water to form solution B. Solution B was quickly injected into solution A and kept vigorous stirring for 0.5 h. Then, the mixed slurry was transferred into Teflon-lined stainless steel autoclave (100 mL) and reacted at 90 °C for 24 h. After cooling down to room temperature, the precipitate was collected by centrifugation and washed with distilled water and ethanol for several times, and dried at 60 °C for 12 h. The obtained powder was calcined in air at 550 °C for 4 h, and then calcined at 200 °C under hydrogen and argon mixture (H<sub>2</sub>/Ar = 1/9) atmosphere for 0.5 h to form Fe-CeO<sub>2</sub> nanorods.

## 2. Characterization of materials

The powder XRD pattern was gained on a Rigaku model Ultima IV diffractometer with a Rigaku D/teX ultra-high-speed position-sensitive detector and Cu-Kα X-ray (40 kV and 100 mA) to identify the crystalline structures. The SEM image was examined on the FEI Nova Nano 230 scanning electron microscope. The energy of the electron beam was 15 and 20 keV, respectively. TEM imaging was performed on a Philips Tecnai F20 system at 200 kV. The chemical composition and valence state of the sample were tested by XPS (AXIS ULTRA AlKα1486.6 eV). The element composition was also passed ICP-AES (PerkinElmerBest 83000). The porosity was measured on a BELSORP-Mini instrument with a 77 K nitrogen adsorption-desorption isotherm. Furthermore, the instruments and excitations were taken for Raman spectra characterization are Lab Ram Aramis Raman and HeeNe laser (λ = 633 nm), respectively. Mapada UV 6300 spectrophotometer (Shanghai, China) was taken for detect UV-Vis absorbance. <sup>1</sup>H NMR spectra were recorded on a

Bruker NMR spectrometer (400 MHz) with chemical shifts reported as ppm in DMSO-d<sub>6</sub>.

### 3. Preparations of the working electrodes

First, 7 mg of Fe-CeO<sub>2</sub> HM powder mixed with 3 mg carbon (Vulcan XC-72) were dispersed in 950  $\mu$ L of isopropanol containing 50  $\mu$ L of Nafion, and a uniform suspension was formed after ultrasonic treatment for 1 h. Then, the suspension was dropped onto a glassy carbon electrode (0.07065 cm<sup>2</sup>) with a total mass load of 0.283 mg/cm<sup>2</sup>. The electrode was used as a working electrode for electrochemical test.

### 4. Electrocatalytic measurements

The electrochemical measurements were conducted on a CHI model 760E electrochemical workstation using an airtight typical three-electrode H-cell separated by a Nafion 117 membrane (DuPont) at room temperature and pressure. A platinum electrode and a SCE were used as the counter and reference electrode, respectively. In this work, the real value of measured potential ( $E_{SCE}$ ) for a SCE electrode versus the reversible hydrogen electrode (RHE) was standardized using a platinum plate electrode (1  $\times$  1 cm<sup>2</sup>) to test the H<sub>2</sub> evolution and oxidation polarization curves in hydrogen atmosphere at a scan rate 5 mV s<sup>-1</sup>. The electrolyte was 0.1 M anhydrous sodium sulfate (Na<sub>2</sub>SO<sub>4</sub>). N<sub>2</sub> and Ar gases were pretreated severally by flowing into 0.1 M KOH and 0.1 M H<sub>2</sub>SO<sub>4</sub> water solutions, ensuring no N-containing impurity in the gases for NRR tests. Before each electrochemical measurement, the electrochemical system was bubbled continuously with N<sub>2</sub> gas for more than 30 min, and the gas was maintained throughout the reactions. The scan rate of linear scan voltammetry is set to 1 mV s<sup>-1</sup>, and the current density is normalized by the geometric surface area. The NRR performance of the catalyst was tested for 2 h using the potentiostatic method at room temperature.

### 5. Ammonia quantification by Nessler's reagent method and indophenol blue method

The detection of NH<sub>3</sub> was made by ultraviolet spectrophotometry using indophenol blue method and Nessler's reagent method.<sup>2,3</sup> For Nessler's reagent method, 300  $\mu$ L potassium sodium tartrate solution (0.2 M) was added into 3 mL post-electrolysis electrolyte. Subsequently, 300  $\mu$ L Nessler's reagent was mixed with the resulting solution. The mixture was kept in dark for 20 min. Finally, the absorption spectra of the obtained solution at  $\lambda = 425$  nm was tested by ultraviolet-visible (UV-vis) spectrophotometer. To calculate the amount of produced NH<sub>3</sub>, the calibration curve was fitted using standard ammonia chloride solutions of 0.01, 0.03, 0.05, 0.07, 0.09, 0.1, 0.15, 0.20, 0.25 and 0.30 mM in 0.1 M Na<sub>2</sub>SO<sub>4</sub>. The fitting curve ( $y = 2.0751x + 0.0077$ ,  $R^2 = 0.9997$ ) shows good linear relation of absorbance value with NH<sub>3</sub> concentration by three times independent calibrations. For the indophenol blue method, 1 mL of the post-electrolysis electrolyte was pipetted and mixed with 1 M NaOH solution containing 5 wt% salicylic acid and 5 wt% sodium citrate. Then, 500  $\mu$ L NaClO solution (0.05 M) and 100  $\mu$ L sodium nitroferricyanide solution (1 wt%) were added into the mixture sequentially. After 2 h, the mixed solution was tested by ultraviolet-visible (UV-vis) spectrophotometer to obtain the absorption spectra and the peak of the resulting indophenol blue was at  $\lambda = 655$  nm. To calculate the amount of produced NH<sub>3</sub>, the calibration curve was fitted using standard ammonia chloride solutions of 0, 0.1, 0.25, 0.5, 1 and 2  $\mu$ g mL<sup>-1</sup> in 0.1 M Na<sub>2</sub>SO<sub>4</sub>. The fitting curve ( $y = 0.517x + 0.0364$ ,  $R^2 = 0.9993$ ) shows good linear relation of absorbance value with NH<sub>3</sub> concentration by three times independent calibrations.

### 6. Calculations of NH<sub>3</sub> yield and Faradic efficiency (FE)

The ammonia yield and FE can be calculated according to Eq. (1), Eq. (2)

$$NH_3 \text{ yield} = 17 \times c(NH_3) \times V \div (m \times t) \quad (1)$$

$$FE = 3 \times F \times c(NH_3) \times V \div (17 \times Q) \quad (2)$$

where  $c(NH_3)$  is the NH<sub>3</sub> concentration, V is the electrolyte volume, t is the electrolysis time, m is the catalyst weight, F is Faraday constant (96485 C mol<sup>-1</sup>) and Q is the total charge during electrolysis.

### 7. Hydrazine quantification

The hydrazine concentration was estimated by the method of Watt and Chrisp.<sup>4</sup> A mixture of p-dimethylaminobenzaldehyde (4 g), concentrated hydrochloric acid (20 mL) and ethanol (200

mL) was used as a color reagent. 5 mL electrolyte taken out from the cathodic chamber was added into 5 mL color reagent. After 15 min, the absorbance of the resulting solution was measured at 455 nm by using UV-vis spectrophotometer. The yield of  $\text{N}_2\text{H}_4$  were estimated from a concentration-absorbance calibration curve using standard hydrazine monohydrate solution of 0.000, 0.001, 0.003, 0.005, 0.007, 0.009, 0.010 and 0.015 mM in 0.1 M  $\text{Na}_2\text{SO}_4$ . The fitting curve ( $y = 35.782x + 0.0262, R^2 = 0.9992$ ) shows good linear relation of absorbance with  $\text{N}_2\text{H}_4$  concentration by three times of independent calibrations.

### **8. Isotope labeling experiment**

The  $^{14}\text{N}$  and  $^{15}\text{N}$  isotopic experiments were conducted using  $^{14}\text{N}_2$  and  $^{15}\text{N}_2$  as feeding gases for nitrogen reduction catalysis. Prior to use for NRR tests,  $^{14}\text{N}_2$  and  $^{15}\text{N}_2$  gases were purged through 1 mM  $\text{H}_2\text{SO}_4$  solution and water to eliminate the potential contaminants. After 2 h electrochemical NRR in 0.1 M  $\text{Na}_2\text{SO}_4$  solution at  $-0.4$  V vs RHE, the post electrolyte solution was concentrated to 2.0 mL. Then, this solution was mixed with HCl and DMSO- $d_6$  solutions and used for  $^1\text{H}$  NMR measurement (Bruker AVANCE AV III 400).

## 9. Figures and tables

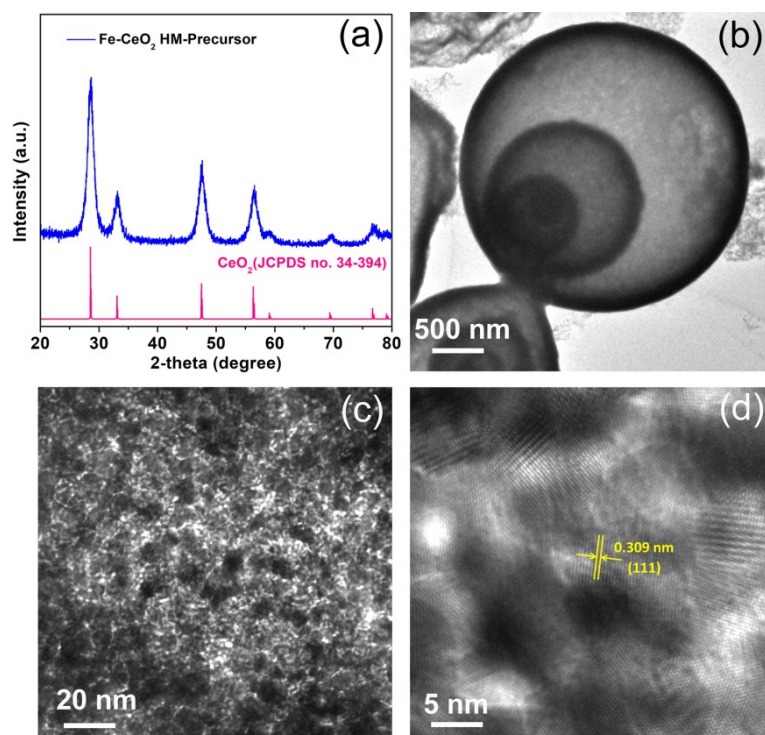

**Fig. S1** (a) XRD pattern (b-d) Low- and high-magnification TEM images of Fe-CeO<sub>2</sub> HM-Precursor only calcined in air.

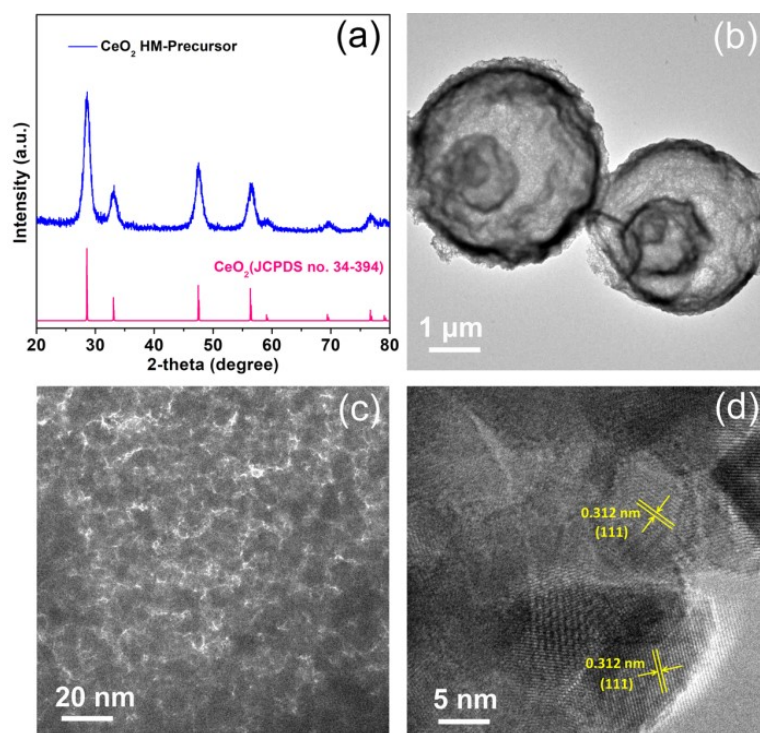

**Fig. S2** (a) XRD pattern, (b-d) Low- and high-magnification TEM images of CeO<sub>2</sub> HM-Precursor only calcined in air.

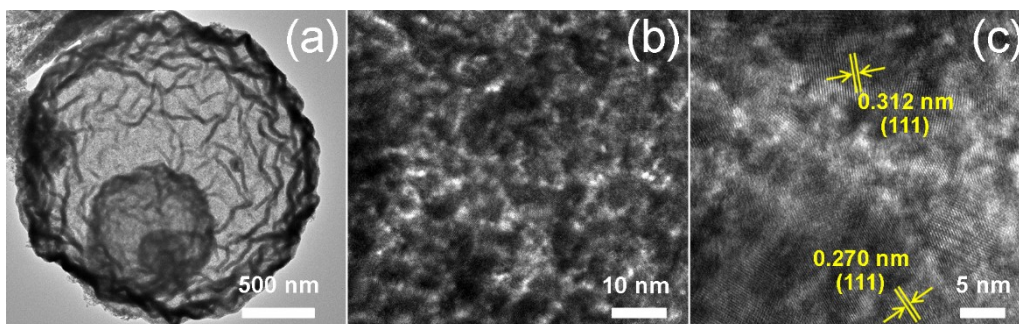

**Fig. S3** TEM (a) and HRTEM (b, c) image of CeO<sub>2</sub> HM

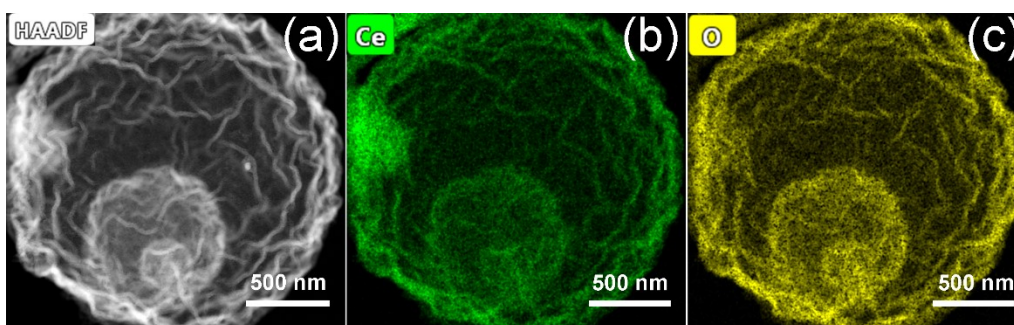

**Fig. S4** HAADF-STEM image and STEM-EDS elemental mapping of CeO<sub>2</sub> HM

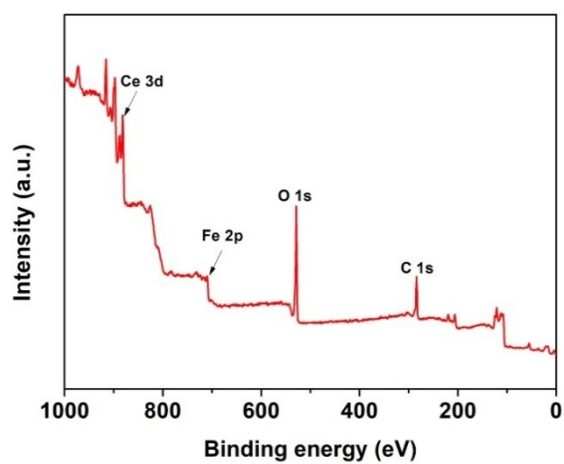

**Fig. S5** The surface survey XPS spectra of Fe-CeO<sub>2</sub> HM

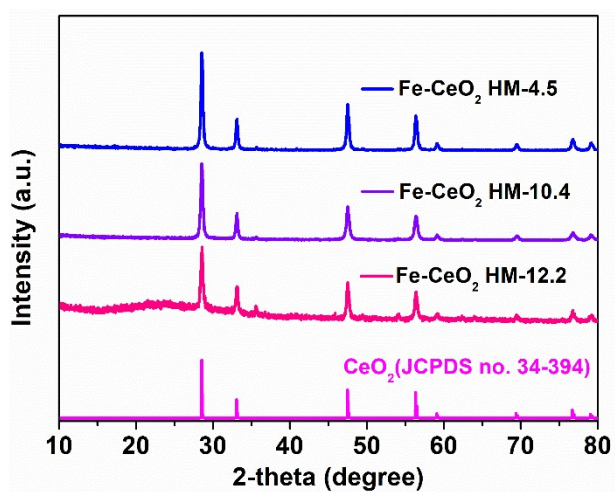

**Fig. S6** XRD pattern of Fe doped CeO<sub>2</sub> catalysts with different Fe doping mass content.

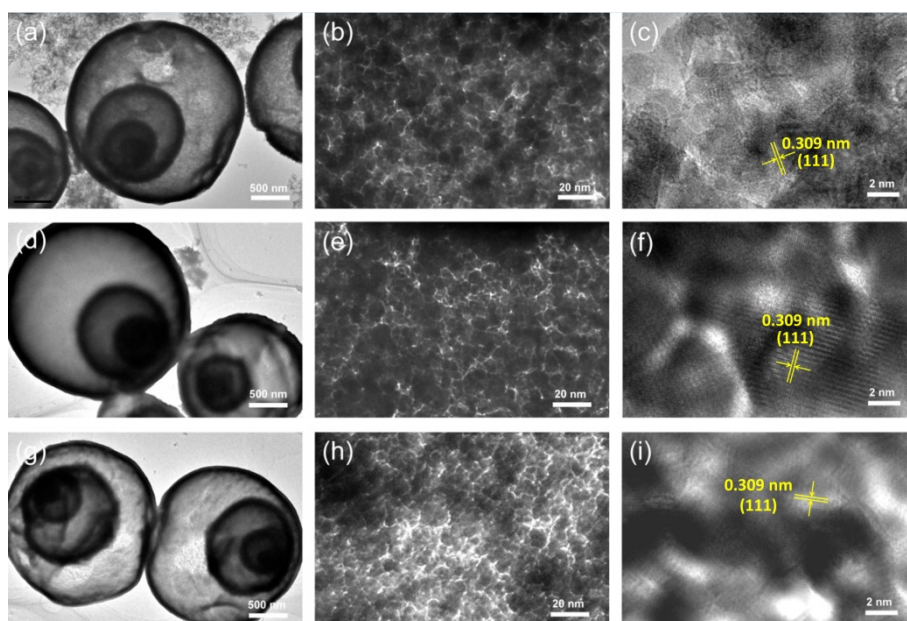

**Fig. S7** TEM and HRTEM image of (a-c) CeO<sub>2</sub> HM-4.5, (d-f) CeO<sub>2</sub> HM-10.4 and (g-i) CeO<sub>2</sub> HM-12.2.

**Table S1** The doped Fe content in different samples determined by ICP–AES

| Catalyst                    | Fe (mg) | Fe ( $\mu\text{mol}$ ) | Mass Content (wt.%) |
|-----------------------------|---------|------------------------|---------------------|
| Fe-CeO <sub>2</sub> HM-4.5  | 0.225   | 4.017                  | 4.5                 |
| Fe-CeO <sub>2</sub> HM-7.1  | 0.355   | 6.339                  | 7.1                 |
| Fe-CeO <sub>2</sub> HM-10.4 | 0.520   | 9.285                  | 10.4                |
| Fe-CeO <sub>2</sub> HM-12.2 | 0.610   | 10.892                 | 12.2                |

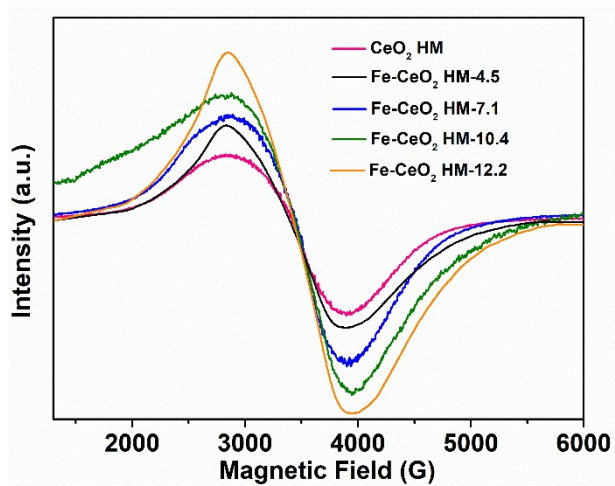

**Fig. S8** Electron paramagnetic resonance (EPR) spectra of CeO<sub>2</sub> HM, Fe-CeO<sub>2</sub> HM-4.5, Fe-CeO<sub>2</sub> HM-7.1, Fe-CeO<sub>2</sub> HM-10.4, Fe-CeO<sub>2</sub> HM-12.2



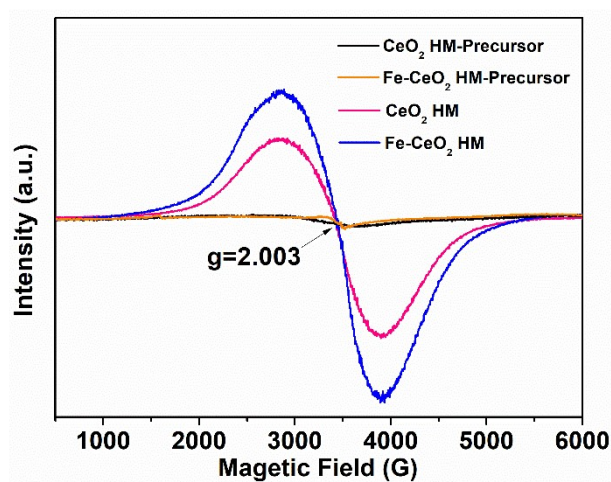

**Fig. S9** Electron paramagnetic resonance (EPR) spectra of CeO<sub>2</sub> HM-Precursor and Fe-CeO<sub>2</sub> HM-Precursor only calcined in air, as well as CeO<sub>2</sub> HM and Fe-CeO<sub>2</sub> HM samples.

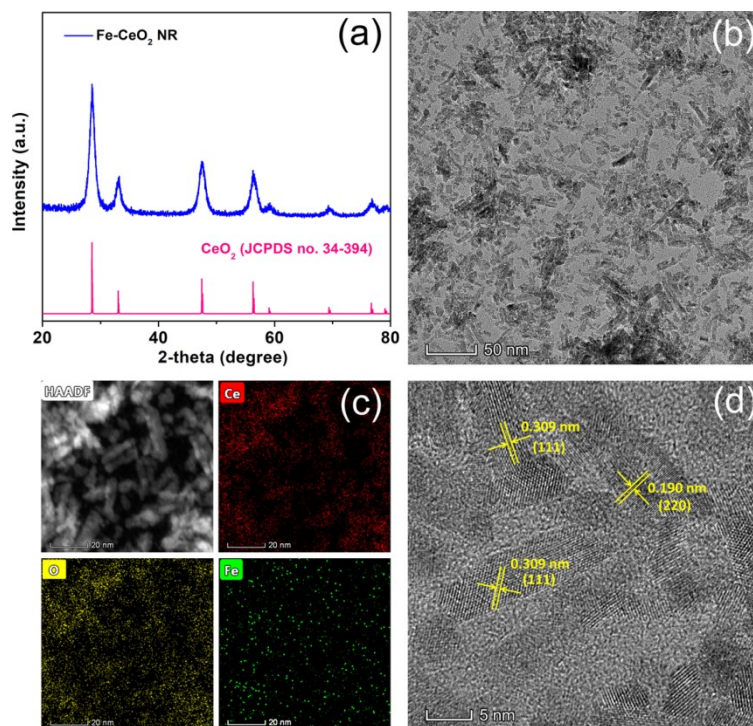

**Fig. S10** (a) XRD pattern, (b) TEM image, (c) EDS elemental mapping images and (d) high-magnification TEM image of Fe-CeO<sub>2</sub> nanorods (abbreviated as Fe-CeO<sub>2</sub> NR).

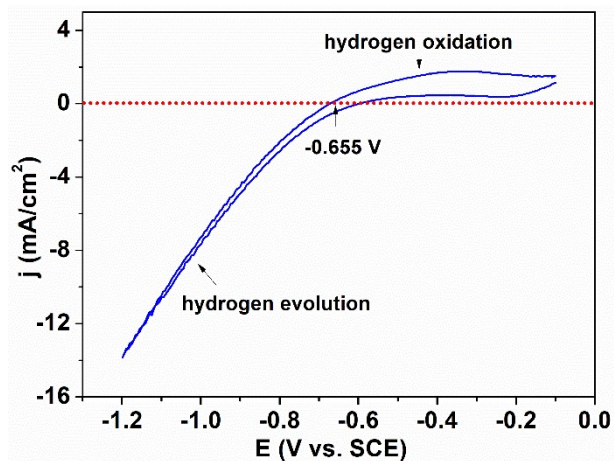

**Fig. S11** Potential calibration of reference electrode in  $\text{H}_2$ -saturated 1.0 M  $\text{Na}_2\text{SO}_4$  solution. CV curves of platinum plate electrode recorded at a scan rate  $5 \text{ mV s}^{-1}$ . The CV result of RHE calibration:  $E_{(RHE)} = E_{(SCE)} + 0.655 \text{ V}$ .

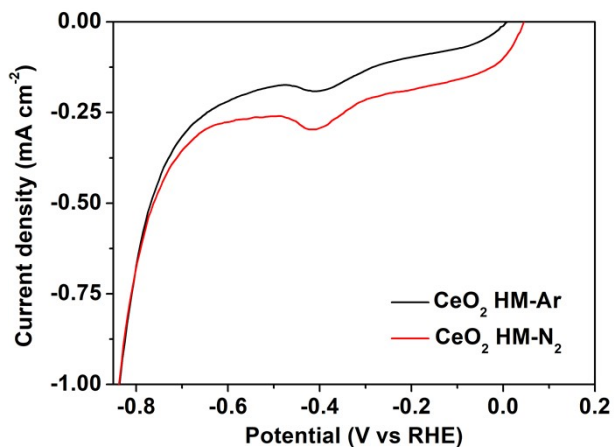

**Fig. S12.** Polarization curves of  $\text{CeO}_2$  HM.

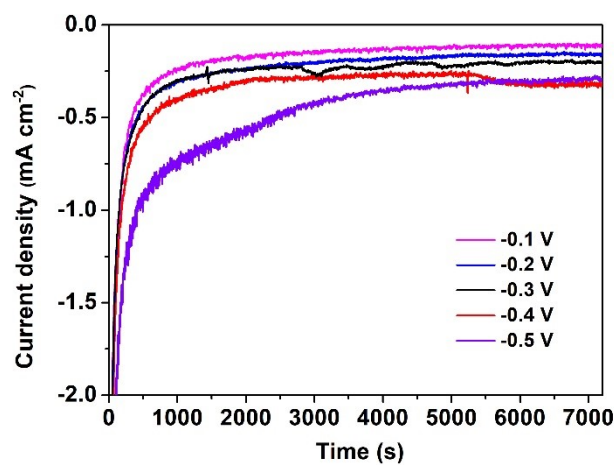

**Fig. S13** Chronoamperometry curves of  $\text{CeO}_2$  HM catalyst obtained at different potentials in  $\text{N}_2$ -saturated 0.1 M  $\text{Na}_2\text{SO}_4$  solution.

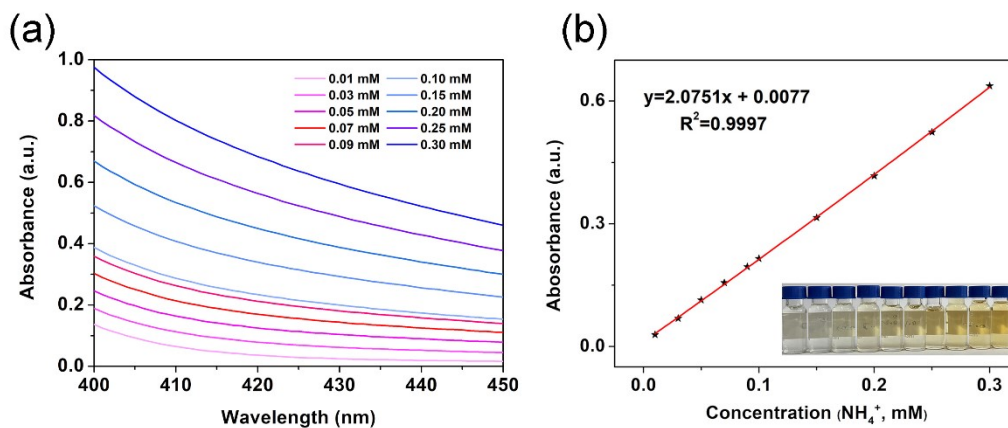

**Fig. S14** (a) UV-vis curves of Nessler's reagent solutions. (b) Calibration curve used to estimate the concentrations of  $\text{NH}_4^+$  ions.

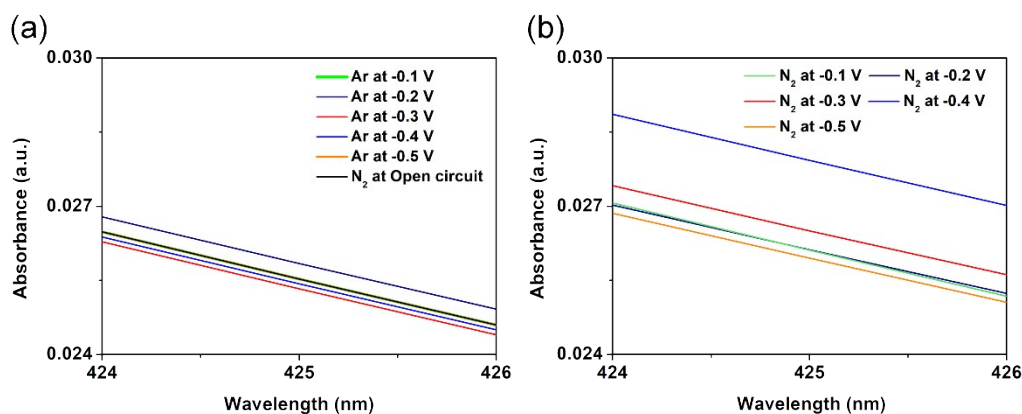

**Fig. S15** (a) UV-vis colorimetric spectra of Ar-saturated electrolytes stained by Nessler indicator after 2 h electrolysis at respective potentials and  $\text{N}_2$ -saturated electrolytes stained by Nessler indicator after 2 h electrolysis under open circuit potential. (b) UV-vis colorimetric spectra  $\text{N}_2$ -saturated electrolytes stained by Nessler indicator after 2 h electrolysis at respective potentials.

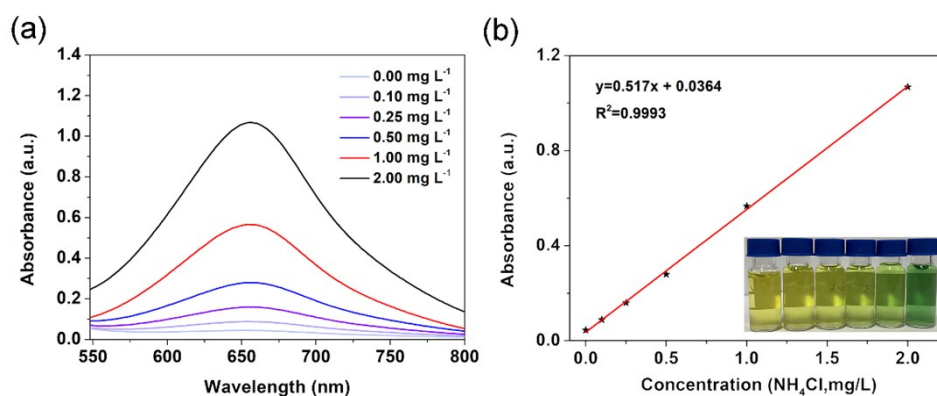

**Fig. S16** (a) UV-vis colorimetric spectra of indophenol blue solutions. (b) Calibration curve used to estimate the concentrations of  $\text{NH}_4^+$  ions.

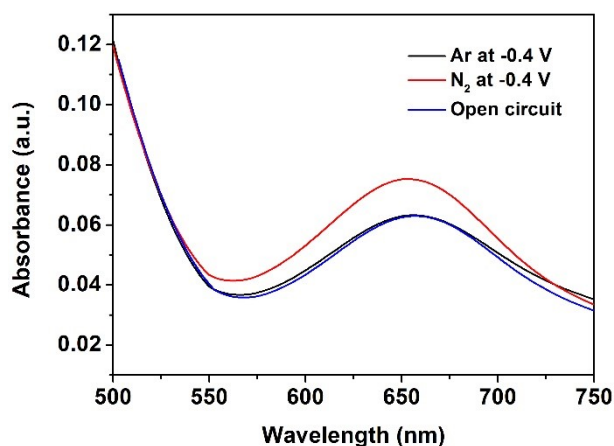

**Fig. S17** UV-vis colorimetric spectra of Ar-saturated electrolyte stained by indophenol blue indicator after 2 h electrolysis by Fe-CeO<sub>2</sub> HM modified electrode under a potential of -0.4 V (black), N<sub>2</sub>-saturated electrolyte stained by indophenol blue indicator after 2 h electrolysis by Fe-CeO<sub>2</sub> HM modified electrode under -0.4 V (red) and N<sub>2</sub>-saturated electrolytes stained by indophenol blue indicator after 2 h electrolysis by Fe-CeO<sub>2</sub> HM modified electrode under open circuit potential (blue).

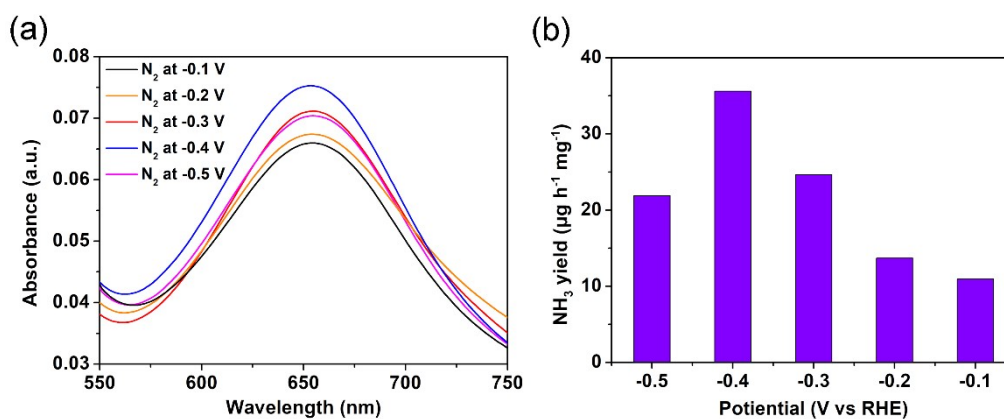

**Fig. S18** (a) UV-vis colorimetric spectra of N<sub>2</sub>-saturated electrolyte stained by indophenol blue indicator after 2 h electrolysis by Fe-CeO<sub>2</sub> HM modified electrode under at respective potentials. (b) The comparison of NH<sub>3</sub> yield detected by indophenol blue method at different potentials.

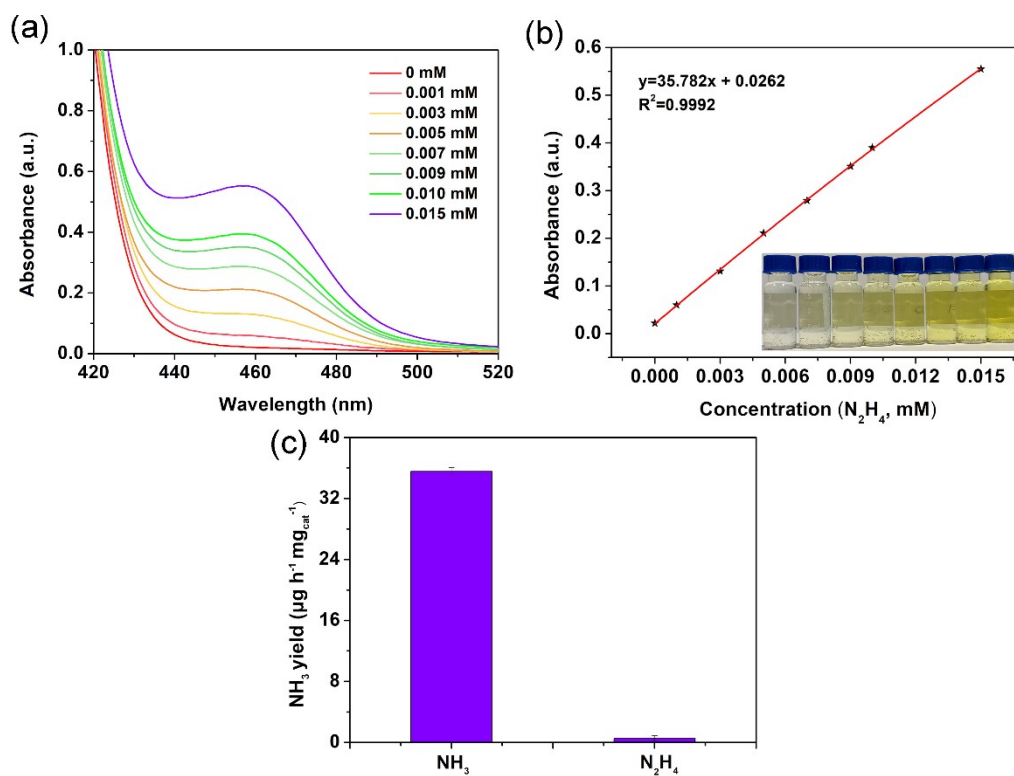

**Fig. S19** (a) UV-vis colorimetric spectra of various concentrations of  $N_2H_4$  using Watt and Chrisp method. (b) The standard curve used for assessment of  $N_2H_4$  concentrations. (c) The yield of  $NH_3$  and  $N_2H_4$ .

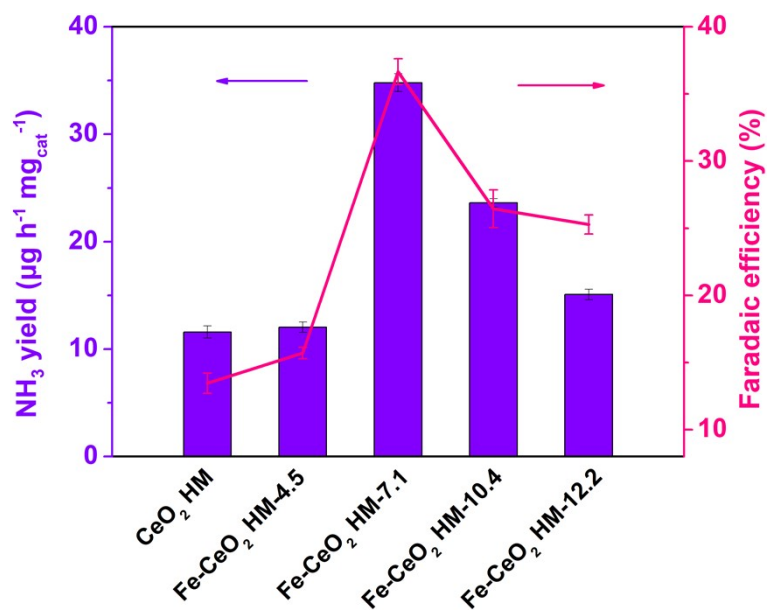

**Fig. S20** NRR performance of different electrocatalysts obtained at  $-0.4$  V.

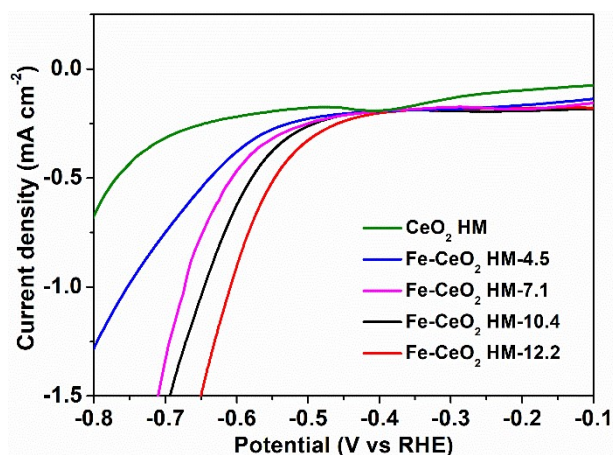

**Fig. S21** LSV curves of  $\text{CeO}_2$  HM and Fe doped  $\text{CeO}_2$  HM with different Fe doping mass ratios in Ar-saturated 0.1 M  $\text{Na}_2\text{SO}_4$  solution.

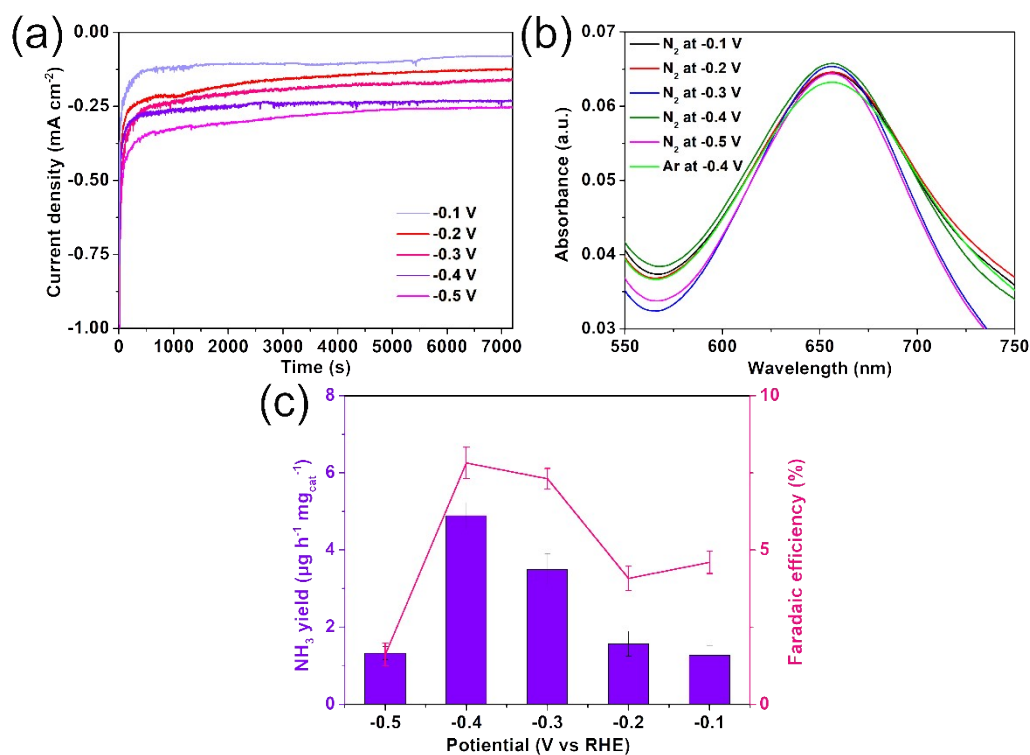

**Fig. S22** NRR performance of  $\text{CeO}_2$  HM-Precursor. (a) Time-dependent current density curves for  $\text{CeO}_2$  HM-Precursor at each given potential. (b) UV-vis colorimetric spectra of  $\text{N}_2$ -saturated electrolytes stained by indophenol blue indicator after 2 h electrolysis at respective potentials and Ar-saturated electrolytes stained by indophenol blue indicator after 2 h electrolysis at -0.4 V. (c) The comparison of ammonia yield and faradaic efficiency at different potentials.

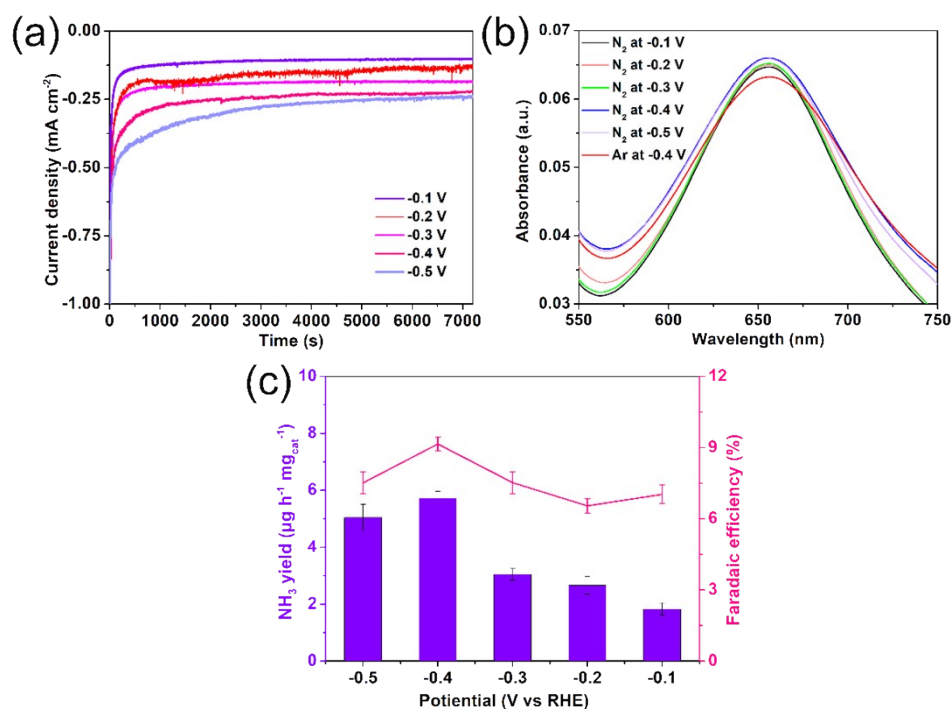

**Fig. S23** NRR performance of Fe-CeO<sub>2</sub> HM-Precursor. (a) Time-dependent current density curves for Fe-CeO<sub>2</sub> HM-Precursor at each given potential. (b) UV-vis colorimetric spectra of N<sub>2</sub>-saturated electrolytes stained by indophenol blue indicator after 2 h electrolysis at respective potentials and Ar-saturated electrolytes stained by indophenol blue indicator after 2 h electrolysis at -0.4 V. (c) The comparison of ammonia yield and faraday efficiency at different potentials.

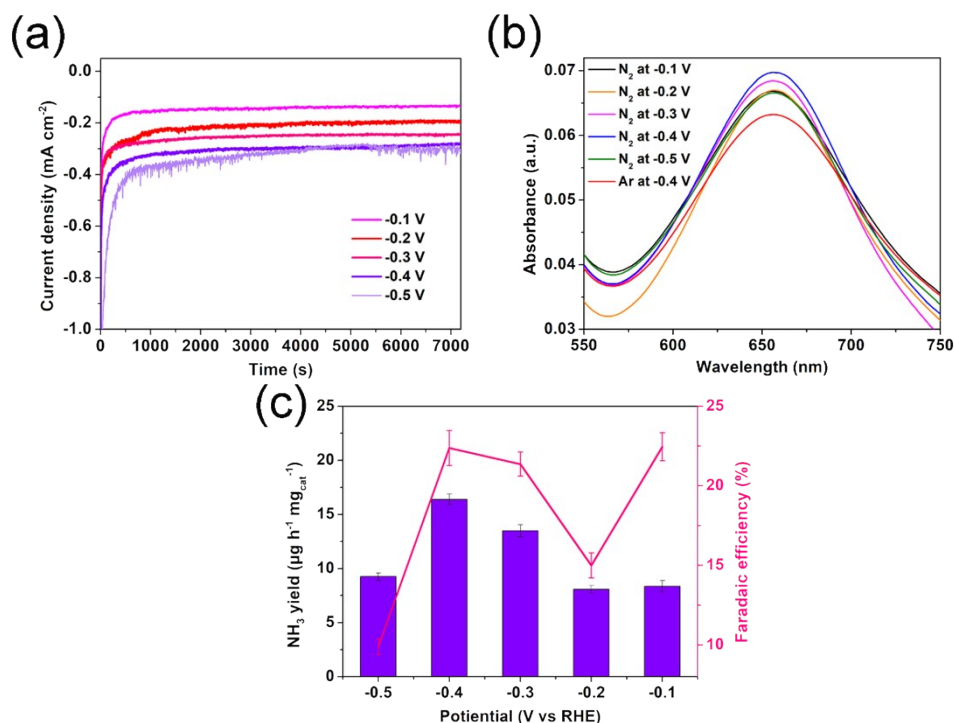

**Fig. S24** NRR performance of Fe-CeO<sub>2</sub> NR. (a) Time-dependent current density curves for Fe-CeO<sub>2</sub> NR at each given potential. (b) UV-vis colorimetric spectra of N<sub>2</sub>-saturated electrolytes stained by indophenol blue indicator after 2 h electrolysis at respective potentials and Ar-saturated electrolytes stained by indophenol blue indicator after 2 h electrolysis at -0.4 V. (c) The comparison of ammonia yield and faraday efficiency at different potentials.

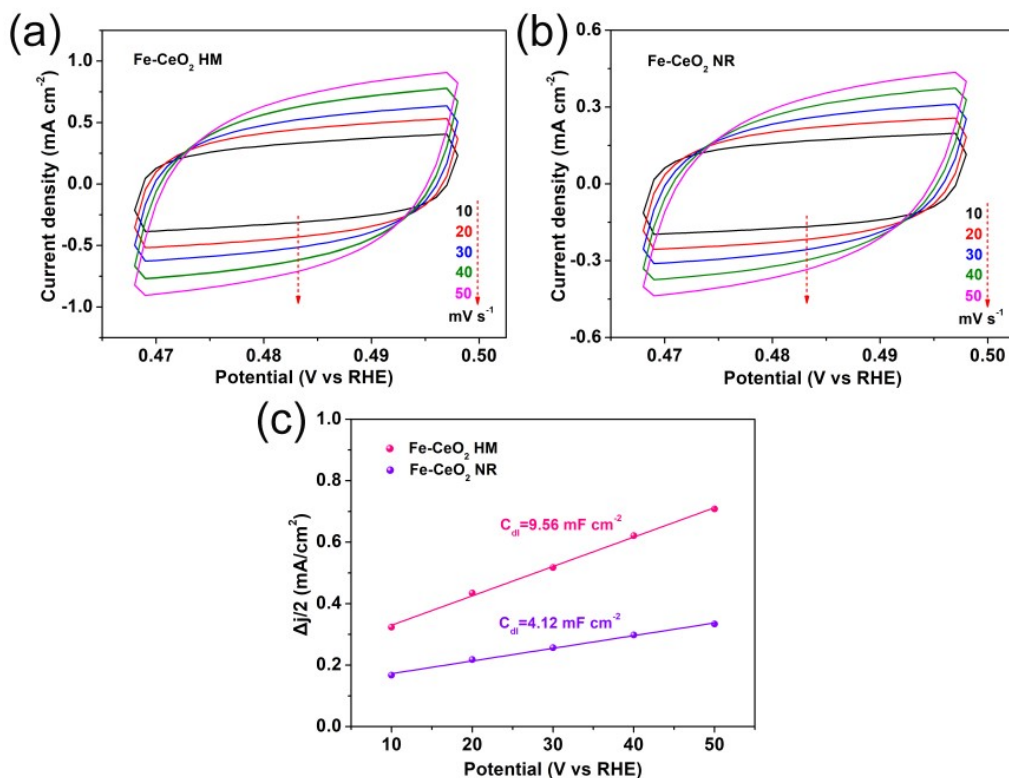

**Fig. S25** (a) CV curves at different scan rates within the non-Faradaic potential range for Fe-CeO<sub>2</sub> HM, (b) CV curves at different scan rates within the non-Faradaic potential range for Fe-CeO<sub>2</sub> RN, (c) Capacitive currents on the basis of scan rate for Fe-CeO<sub>2</sub> HM and Fe-CeO<sub>2</sub> NR.

The ECSA was determined assuming a general specific  $C_{dl}$  capacitance of  $40 \mu\text{F cm}^{-2}$  for all samples

$$A_{ECSA}^{Fe-CeO_2 HM} = \frac{9.56 \text{ mF cm}^{-2}}{40 \mu\text{F cm}^{-2} \text{ per cm}_{ECSA}^2} = 239 \text{ cm}_{ECSA}^2$$

$$A_{ECSA}^{Fe-CeO_2 RN} = \frac{4.12 \text{ mF cm}^{-2}}{40 \mu\text{F cm}^{-2} \text{ per cm}_{ECSA}^2} = 103 \text{ cm}_{ECSA}^2$$

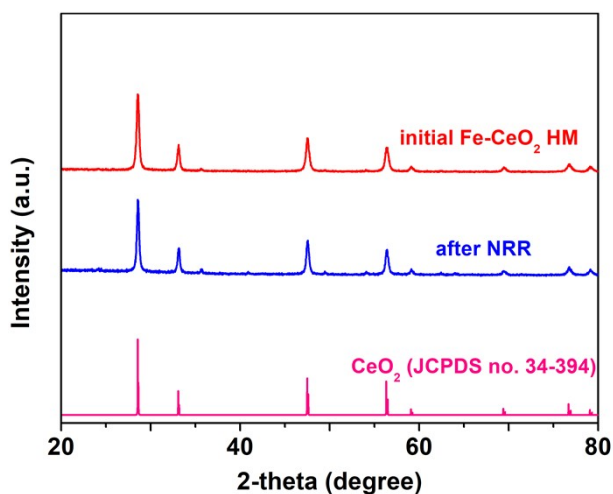



**Fig. S26** XRD patterns of the Fe-CeO<sub>2</sub> HM before and after NRR stability tests.

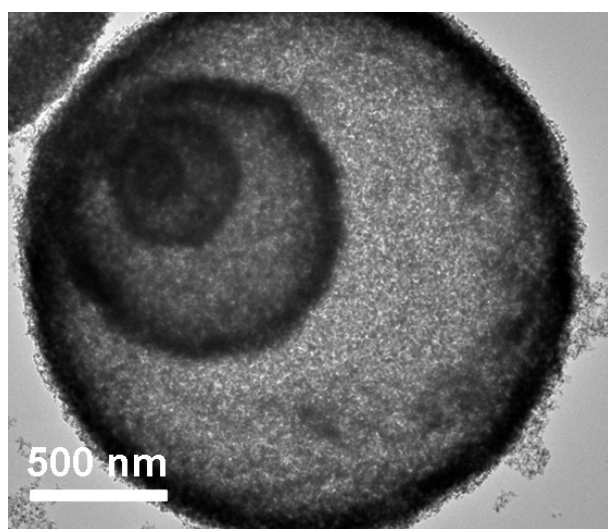

**Fig. S27** TEM images of the Fe-CeO<sub>2</sub> HM after NRR stability tests.

**Table S2.** The NRR performance of Fe-CeO<sub>2</sub> HM comparing with other reported catalysts

| Catalyst                                                                      | Electrolyte                           | NH <sub>3</sub> yield                                    | FE(%)  |
|-------------------------------------------------------------------------------|---------------------------------------|----------------------------------------------------------|--------|
| Fe <sub>2</sub> O <sub>3</sub> nanorod <sup>5</sup>                           | 0.1 M Na <sub>2</sub> SO <sub>4</sub> | 15.9 μg h <sup>-1</sup> mg <sup>-1</sup> <sub>cat</sub>  | 0.94%  |
| γ-Fe <sub>2</sub> O <sub>3</sub> <sup>6</sup>                                 | 0.1 M KOH                             | 0.212 μg h <sup>-1</sup> mg <sup>-1</sup> <sub>cat</sub> | 1.90%  |
| β-FeOOH <sup>7</sup>                                                          | 0.5 M LiClO <sub>4</sub>              | 23.32 μg h <sup>-1</sup> mg <sup>-1</sup> <sub>cat</sub> | 6.70%  |
| Fe/Fe <sub>3</sub> O <sub>4</sub> <sup>8</sup>                                | phosphate buffer<br>solution          | 0.19 μg h <sup>-1</sup> mg <sup>-1</sup> <sub>cat</sub>  | 8.29%  |
| Bi <sub>4</sub> V <sub>2</sub> O <sub>11</sub> /CeO <sub>2</sub> <sup>9</sup> | 0.1 M HCl                             | 23.21 μg h <sup>-1</sup> mg <sup>-1</sup> <sub>cat</sub> | 10.16% |
| r-CeO <sub>2</sub> nanorod <sup>10</sup>                                      | 0.1 M Na <sub>2</sub> SO <sub>4</sub> | 16.4 μg h <sup>-1</sup> mg <sup>-1</sup> <sub>cat</sub>  | 3.70%  |
| Fe-TiO <sub>2</sub> <sup>11</sup>                                             | 0.5 M LiClO <sub>4</sub>              | 25.47 μg h <sup>-1</sup> mg <sup>-1</sup> <sub>cat</sub> | 25.60% |
| CeO <sub>2</sub> rGO <sup>12</sup>                                            | 0.1 M Na <sub>2</sub> SO <sub>4</sub> | 16.98 μg h <sup>-1</sup> mg <sup>-1</sup> <sub>cat</sub> | 4.78%  |

|                                                        |                                               |                                                                |               |
|--------------------------------------------------------|-----------------------------------------------|----------------------------------------------------------------|---------------|
| FeMoO <sub>4</sub> <sup>13</sup>                       | 0.1 M Na <sub>2</sub> SO <sub>4</sub>         | 17.51 μg h <sup>-1</sup> mg <sup>-1</sup> <sub>cat</sub>       | 10.50%        |
| FeSA-NO-C-900 <sup>14</sup>                            | 0.1 M HCl                                     | 31.9 μg h <sup>-1</sup> mg <sup>-1</sup> <sub>cat</sub>        | 11.80%        |
| OV-rich α-Fe <sub>2</sub> O <sub>3</sub> <sup>15</sup> | 0.1 M KOH                                     | 32.13 μg h <sup>-1</sup> mg <sup>-1</sup> <sub>cat</sub>       | 6.63%         |
| Fe <sub>SA</sub> -N-C <sup>16</sup>                    | 0.1 M KOH                                     | 7.48 μg h <sup>-1</sup> mg <sup>-1</sup> <sub>cat</sub>        | 56.55%        |
| Ru/CeO <sub>2</sub> -Vo <sup>17</sup>                  | 0.05 M H <sub>2</sub> SO <sub>4</sub>         | 9.87 × 10 <sup>-8</sup> mmol·s <sup>-1</sup> ·cm <sup>-2</sup> | 11.70%        |
| Cr <sub>0.1</sub> CeO <sub>2</sub> <sup>1</sup>        | 0.1 M Na <sub>2</sub> SO <sub>4</sub>         | 16.82 μg h <sup>-1</sup> mg <sup>-1</sup> <sub>cat</sub>       | 3.84%         |
| Cu-CeO <sub>2</sub> -3.9 <sup>18</sup>                 | 0.1 M Na <sub>2</sub> SO <sub>4</sub>         | 5.3 × 10 <sup>-10</sup> mol cm <sup>-2</sup> s <sup>-1</sup>   | 19.10%        |
| MnO <sub>x</sub> NA/TM <sup>19</sup>                   | 0.1 M Na <sub>2</sub> SO <sub>4</sub>         | 1.63 × 10 <sup>-10</sup> mol cm <sup>-2</sup> s <sup>-1</sup>  | 11.40%        |
| CuS-CPSs <sup>20</sup>                                 | 0.1 M HCl                                     | 18.18 μg h <sup>-1</sup> mg <sup>-1</sup> <sub>cat</sub>       | 5.63%         |
| LiFe <sub>5</sub> O <sub>8</sub> -rGO/CP <sup>21</sup> | 0.1 M HCl                                     | 36.025 μg h <sup>-1</sup> mg <sup>-1</sup> <sub>cat</sub>      | 13.08%        |
| FeSAs-MoS <sub>2</sub> <sup>22</sup>                   | 0.5 M K <sub>2</sub> SO <sub>4</sub> (pH = 3) | 8.63 μg h <sup>-1</sup> mg <sup>-1</sup> <sub>cat</sub>        | 18.80%        |
| mRhRu/NF <sup>23</sup>                                 | 0.1 M Na <sub>2</sub> SO <sub>4</sub>         | 30.28 μg h <sup>-1</sup> mg <sup>-1</sup> <sub>cat</sub>       | 28.33%        |
| CeP-rGO <sup>24</sup>                                  | 0.1 M HCl                                     | 28.69 μg h <sup>-1</sup> mg <sup>-1</sup> <sub>cat</sub>       | 9.60%         |
| Fe <sub>2</sub> O <sub>3</sub> -rGO <sup>25</sup>      | 0.5 M LiClO <sub>4</sub>                      | 22.13 μg h <sup>-1</sup> mg <sup>-1</sup> <sub>cat</sub>       | 5.89%         |
| MnO/TM <sup>26</sup>                                   | 0.1 M Na <sub>2</sub> SO <sub>4</sub>         | 7.92 μg h <sup>-1</sup> mg <sup>-1</sup> <sub>cat</sub>        | 8.02%         |
| Fe <sub>2</sub> O <sub>3</sub> -CNT <sup>27</sup>      | KHCO <sub>3</sub>                             | 0.22 μg h <sup>-1</sup> cm <sup>-2</sup>                       | 0.15%         |
| 30% Fe <sub>2</sub> O <sub>3</sub> -CNT <sup>28</sup>  | 0.5 M KOH                                     | 0.52 μg h <sup>-1</sup> cm <sup>-2</sup>                       | 0.16%         |
| Fe <sub>3</sub> O <sub>4</sub> /Ti <sup>29</sup>       | 0.1 M Na <sub>2</sub> SO <sub>4</sub>         | 5.6 × 10 <sup>-11</sup> mol s <sup>-1</sup> cm <sup>-2</sup>   | 2.60%         |
| <b>Fe-CeO<sub>2</sub> HM<sup>this work</sup></b>       | <b>0.1 M Na<sub>2</sub>SO<sub>4</sub></b>     | <b>34.79 μg h<sup>-1</sup> mg<sup>-1</sup><sub>cat</sub></b>   | <b>36.66%</b> |

## References

- 1 H. Xie, H. Wang, Q. Geng, Z. Xing, W. Wang, J. Chen, L. Ji, L. Chang, Z. Wang and J. Mao, Oxygen vacancies of Cr-doped CeO<sub>2</sub> nanorods that efficiently enhance the performance of electrocatalytic N<sub>2</sub> fixation to NH<sub>3</sub> under ambient conditions, *Inorg. Chem.*, 2019, **58**, 5423-5427.
- 2 L. Li, C. Tang, B. Xia, H. Jin, Y. Zheng and S.-Z. Qiao, Two-dimensional mosaic bismuth nanosheets for highly selective ambient electrocatalytic nitrogen reduction, *ACS Catal.*, 2019, **9**, 2902-2908.
- 3 F. Pang, Z. Wang, K. Zhang, J. He, W. Zhang, C. Guo and Y. Ding, Bimodal nanoporous Pd<sub>3</sub>Cu<sub>1</sub> alloy with restrained hydrogen evolution for stable and high yield electrochemical nitrogen reduction, *Nano Energy.*, 2019, **58**, 834-841.
- 4 Y. C. Hao, Y. Guo, L. W. Chen, M. Shu, X. Y. Wang, T. A. Bu, W. Y. Gao, N. Zhang, X. Su, X. Feng, J. W. Zhou, B. Wang, C. W. Hu, A. X. Yin, R. Si, Y. W. Zhang and C. H. Yan, Promoting nitrogen electroreduction to ammonia with bismuth nanocrystals and potassium cations in water, *Nat Catal.*, 2019, **2**, 448-456.
- 5 X. Xiang, Z. Wang, X. Shi, M. Fan and X. Sun, Ammonia synthesis from electrocatalytic N<sub>2</sub> reduction under ambient conditions by Fe<sub>2</sub>O<sub>3</sub> nanorods, *ChemCatChem*, 2018, **10**, 4530-4535.
- 6 J. Kong, A. Lim, C. Yoon, J. H. Jang, H. C. Ham, J. Han, S. Nam, D. Kim, Y. E. Sung, J. Choi and H. S. Park, Electrochemical synthesis of NH<sub>3</sub> at low temperature and atmospheric pressure using a γ-Fe<sub>2</sub>O<sub>3</sub> catalyst, *ACS Sustainable Chem. Eng.*, 2017, **5**, 10986-10995.
- 7 X. Zhu, Z. Liu, Q. Liu, Y. Luo, X. Shi, A. M. Asiri, Y. Wu and X. Sun, Efficient and durable N<sub>2</sub> reduction electrocatalysis under ambient conditions: β-FeOOH nanorods as a non-noble-metal catalyst, *Chem. Commun.*, 2018, **54**, 11332-11335.
- 8 C. Li, Y. Fu, Z. Wu, J. Xia and X. Wang, Ambient electrochemical ammonia synthesis with high selectivity on Fe/Fe-oxide catalyst, *ACS Catal.*, 2018, **8**, 9312-9319.
- 9 C. Lv, C. Yan, G. Chen, Y. Ding, J. Sun, Y. Zhou and G. Yu, An amorphous noble-metal-free electrocatalyst that enables nitrogen fixation under ambient conditions, *Angew. Chem. Int. Ed.*, 2018, **57**, 6073-6076.
- 10 B. Xu, L. Xia, F. Zhou, R. Zhao, H. Chen, T. Wang, Q. Zhou, Q. Liu, G. Cui, X. Xiong, F. Gong and X. Sun, Enhancing electrocatalytic N<sub>2</sub> reduction to NH<sub>3</sub> by CeO<sub>2</sub> nanorod with oxygen vacancies, *ACS Sustainable Chem. Eng.*, 2019, **7**, 2889-2893.
- 11 T. Wu, X. Zhu, Z. Xing, S. Mou, C. Li, Y. Qiao, Q. Liu, Y. Luo, X. Shi, Y. Zhang and X. Sun, Greatly improving electrochemical N<sub>2</sub> reduction over TiO<sub>2</sub> nanoparticles by iron doping, *Angew. Chem. Int. Ed.*, 2019, **58**, 18449-18453.
- 12 H. Xie, Q. Geng, X. Li, T. Wang, Y. Luo, A. A. Alshehri, K. A. Alzahrani, B. Li, Z. Wang and J. Mao, Ceria-reduced graphene oxide nanocomposite as an efficient electrocatalyst towards artificial N<sub>2</sub> conversion to NH<sub>3</sub> under ambient conditions, *Chem. Commun.*, 2019, **55**, 10717-10720.
- 13 J. Wu, Z. Wang, S. Li, S. Niu, Y. Zhang, J. Hu, J. Zhao and P. Xu, FeMoO<sub>4</sub> nanorods for efficient ambient electrochemical nitrogen reduction, *Chem. Commun.*, 2020, **56**, 6834-6837.
- 14 Y. Li, J. Li, J. Huang, J. Chen, Y. Kong, B. Yang, Z. Li, L. Lei, G. Chai, Z. Wen, L. Dai and Y. Hou, Boosting electroreduction kinetics of nitrogen to ammonia via tuning electron distribution of single-atomic iron sites, *Angew. Chem. Int. Ed.*, 2021, **60**, 9078-9085.

- 15 C. Zhang, S. Liu, T. Chen, Z. Li and J. Hao, Oxygen vacancy-engineered Fe<sub>2</sub>O<sub>3</sub> nanocubes via a task-specific ionic liquid for electrocatalytic N<sub>2</sub> fixation, *Chem. Commun.*, 2019, **55**, 7370-7373.
- 16 M. Wang, S. Liu, T. Qian, J. Liu, J. Zhou, H. Ji, J. Xiong, J. Zhong and C. Yan, Over 56.55% faradaic efficiency of ambient ammonia synthesis enabled by positively shifting the reaction potential, *Nat. Commun.*, 2019, **10**, 341.
- 17 Y. Ding, L. Huang, J. Zhang, A. Guan, Q. Wang, L. Qian, L. Zhang and G. Zheng, Ru-doped, oxygen-vacancy-containing CeO<sub>2</sub> nanorods toward N<sub>2</sub> electroreduction, *J. Mater. Chem. A*, 2020, **8**, 7229-7234.
- 18 S. Zhang, C. Zhao, Y. Liu, W. Li, J. Wang, G. Wang, Y. Zhang, H. Zhang and H. Zhao, Cu doping in CeO<sub>2</sub> to form multiple oxygen vacancies for dramatically enhanced ambient N<sub>2</sub> reduction performance, *Chem. Commun.*, 2019, **55**, 2952-2955.
- 19 L. Zhang, X.-Y. Xie, H. Wang, L. Ji, Y. Zhang, H. Chen, T. Li, Y. Luo, G. Cui and X. Sun, Boosting electrocatalytic N<sub>2</sub> reduction by MnO<sub>2</sub> with oxygen vacancies, *Chem. Commun.*, 2019, **55**, 4627-4630.
- 20 S. Li, Y. Wu, Q. Liu, B. Li, T. Li, H. Zhao, A. A. Alshehri, K. A. Alzahrani, Y. Luo, L. Li and X. Sun, CuS concave polyhedral superstructures enabled efficient N<sub>2</sub> electroreduction to NH<sub>3</sub> at ambient conditions, *Inorg. Chem. Front.*, 2021, **8**, 3105-3110.
- 21 Y. Ji, L. Li, W. Cheng, Y. Xiao, C. Li and X. Liu, Electrochemical N<sub>2</sub> fixation to NH<sub>3</sub> under ambient conditions: porous LiFe<sub>5</sub>O<sub>8</sub> nanoparticle-reduced graphene oxide as a highly efficient and selective catalyst, *Inorg. Chem. Front.*, 2021, **8**, 3156-3161.
- 22 H. Su, L. Chen, Y. Chen, R. Si, Y. Wu, X. Wu, Z. Geng, W. Zhang and J. Zeng, Single atoms of iron on MoS<sub>2</sub> nanosheets for N<sub>2</sub> electroreduction into ammonia, *Angew. Chem. Int. Ed.*, 2020, **59**, 20411-20416.
- 23 Z. Wang, W. Tian, Z. Dai, T. Zhou, Q. Mao, Y. Xu, X. Li, L. Wang and H. Wang, Bimetallic mesoporous RhRu film for electrocatalytic nitrogen reduction to ammonia, *Inorg. Chem. Front.*, 2021, **8**, 4276-4281.
- 24 Y. Ji, L. Li, W. Cheng, Y. Xiao, C. L and X. Liu, A CeP nanoparticle-reduced graphene oxide hybrid: an efficient electrocatalyst for the NH<sub>3</sub> synthesis under ambient conditions, *Inorg. Chem. Front.*, 2021, **8**, 2103-2106.
- 25 J. Li, X. Zhu, T. Wang, Y. Luo and X. Sun, An Fe<sub>2</sub>O<sub>3</sub> nanoparticle-reduced graphene oxide composite for ambient electrocatalytic N<sub>2</sub> reduction to NH<sub>3</sub>, *Inorg. Chem. Front.*, 2019, **6**, 2682-2685.
- 26 Z. Wang, F. Gong, L. Zhang, R. Wang, L. Ji, Q. Liu, Y. Luo, H. Guo, Y. Li, P. Gao, X. Shi, B. Li, B. Tang and X. Sun, Electrocatalytic hydrogenation of N<sub>2</sub> to NH<sub>3</sub> by MnO: experimental and theoretical investigations, *Adv. Sci.*, 2019, **6**, 1801182-1801190.
- 27 S. Chen, S. Perathoner, C. Ampelli, C. Mebrahtu, D. Su and G. Centi, Electrocatalytic synthesis of ammonia at room temperature and atmospheric pressure from water and nitrogen on a carbon-nanotube-based electrocatalyst, *Angew. Chem. Int. Ed.*, 2017, **56**, 2699-2703.
- 28 S. Chen, S. Perathoner, C. Ampelli, C. Mebrahtu, D. Su and G. Centi, Room-Temperature electrocatalytic synthesis of NH<sub>3</sub> from H<sub>2</sub>O and N<sub>2</sub> in a gas-liquid-solid three-phase reactor, *ACS Sustainable Chem. Eng.*, 2017, **5**, 7393-7400.
- 29 Q. Liu, X. Zhang, B. Zhang, Y. Luo, G. Cui, F. Xie and X. Sun, Ambient N<sub>2</sub> fixation to NH<sub>3</sub> electrocatalyzed by a spinel Fe<sub>3</sub>O<sub>4</sub> nanorod, *Nanoscale*, 2018, **10**, 14386-14389.
